# Supplementary material for: Thermoresponsive behavior of amphiphilic diblock co-oligomers of ethylene glycol and styrene in aqueous solution
Source: Royal Society of Chemistry journal article supplement (doi:10.1039/c3sm50245g), 2013-01-01
Supplement: c3sm50245g.pdf [file c3sm50245g.pdf]

Supplementary Information

**Thermoresponsive Behaviour of Amphiphilic Diblock Co-Oligomers of Ethylene Glycol and Styrene in Aqueous Solution**

*Meiliana Siauw, Paul Fitzgerald, Brian S. Hawket, Sébastien Perrier\**

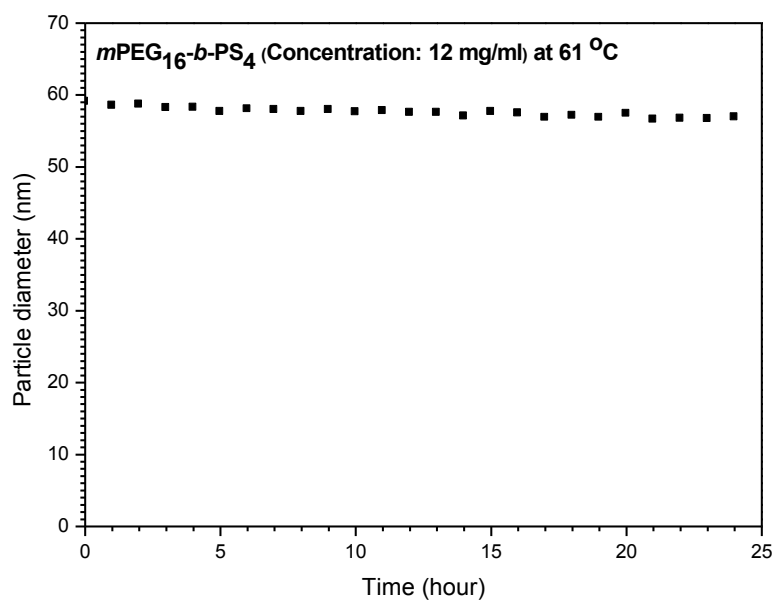

**Figure S1.** Particle size of the self-assembly solution of *mPEG*<sub>16</sub>-*b*-*PS*<sub>4</sub> at 12 mg/mL holding at 61 °C as a function of time by DLS.

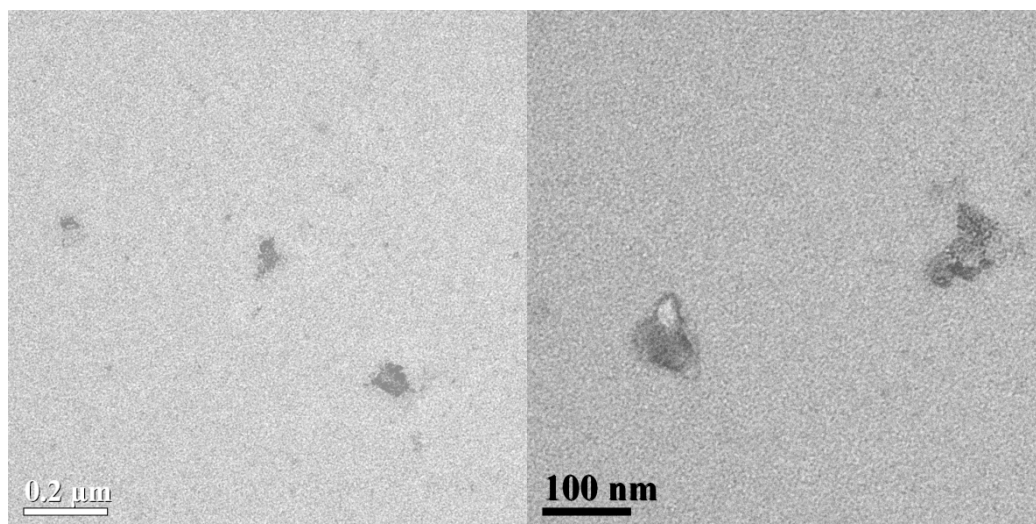

**Figure S2.** TEM images of the self-assembly solution of  $m\text{PEG}_{16}\text{-}b\text{-PS}_6$  at room temperature after the heating process.
